# Supplementary material
Source: PubMed Central journal article supplement (PMC10992002)
Supplement: 262_2020_2767_MOESM1_ESM.pdf [file 262_2020_2767_MOESM1_ESM.pdf]

Suppl. Fig. 1

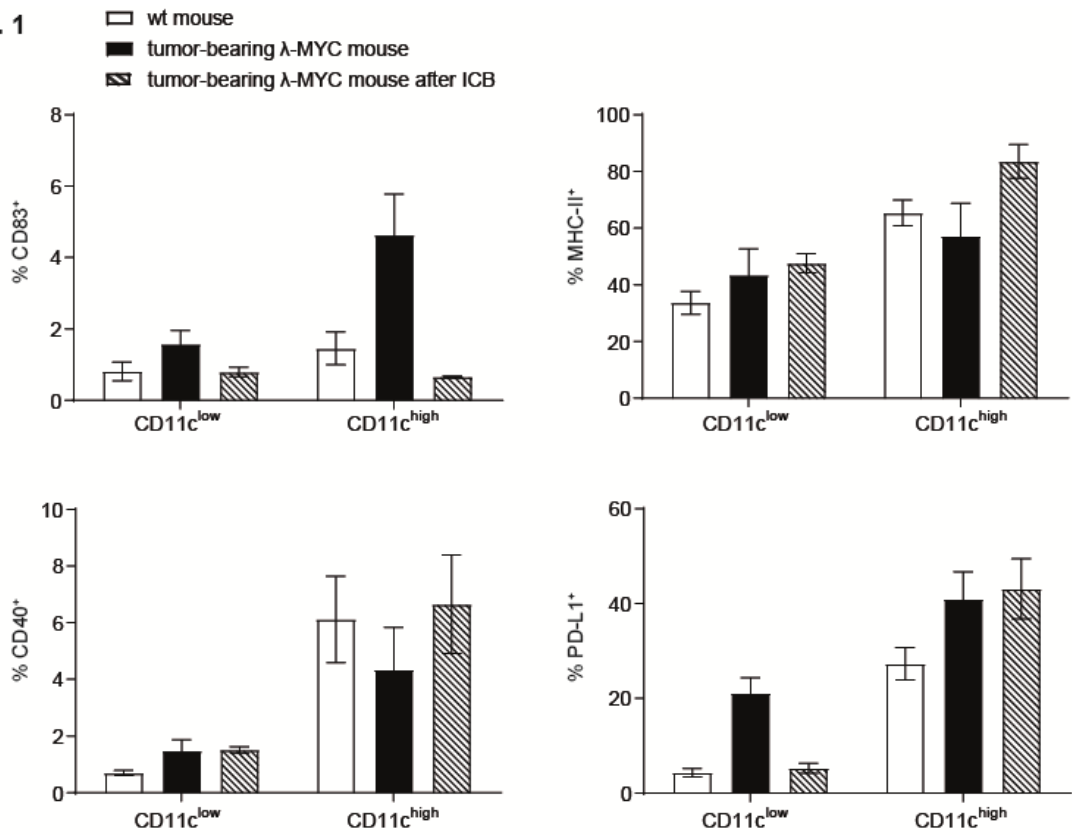

**Supplementary Figure 1** Quantitation of CD83, CD40, MHCII and PD-L1 expressed on CD11c<sup>low</sup> and CD11c<sup>high</sup> spleen DCs from tumor-bearing  $\lambda$ -MYC mice that did or did not receive ICB treatment. WT mice are included for comparison. 4 to 10 animals were analyzed in the ICB and in the control group, respectively. A statistically significant effect of ICB therapy in comparison to the untreated group was only seen for CD83 in the CD11c<sup>high</sup> fraction and for PD-L1 in the CD11c<sup>low</sup> population (P<0.05 and P<0.005, respectively).
